# Supplementary material for: Predation Risk Effects of Lady Beetle Menochilus sexmaculatus (Fabricius) on the Melon Aphid, Aphis gossypii Glover
Source: MDPI journal article supplement (doi:10.3390/insects15010013), 2023-12-27
Supplement: s1 [file s1]

**Supplementary Table S1.** Compounds of *Menochilus sexmaculata* collected with HS-SPME

| Number | Compound                                         | CAS        | Exist     |
|--------|--------------------------------------------------|------------|-----------|
| 1      | Anethole                                         | 104-46-1   | M、F、<br>3 |
| 2      | (+)-Longicyclene                                 | 1137-12-8  | 3         |
| 3      | (-)-isolongifolene                               | 1135-66-6  | M、F       |
| 4      | (+)-Longifolene                                  | 475-20-7   | M、F、<br>3 |
| 5      | Caryophyllene                                    | 87-44-5    | 3         |
| 6      | 1,6-anhydro- $\beta$ -D-glucose                  | 498-07-7   | 3         |
| 7      | Precocinelline                                   | 38211-56-2 | M、F、<br>3 |
| 8      | 2,6-Di-tert-butylpyridine                        | 585-48-8   | M、F       |
| 9      | 7-Isoquinolinol, 3,4-dihydro-6-methoxy-1-methyl- | 4602-71-5  | F         |
| 10     | Adenine                                          | 73-24-5    | 3         |
| 11     | N,N-dimethylhexadecylamine                       | 112-69-6   | 3、F       |
| 12     | 2,5 – Dimethyl – 7 – hydroxy chromone            | 38412-47-4 | 3         |
| 13     | n-Tricosane                                      | 638-67-5   | M         |
| 14     | n-Pentacosane                                    | 629-99-2   | M、3       |
| 15     | 1-Heptacosanol                                   | 2004-39-9  | M         |

Note: In the exist column, "M" indicates the males, "F" indicates the females t, and "3" indicates the third-instar larvae.

**Supplementary Table S2.** Compounds of *Menochilus sexmaculata* extracted with n-Hexane

| Number | Compound                                                 | CAS          | Exist     |
|--------|----------------------------------------------------------|--------------|-----------|
| 1      | Ethylbenzene                                             | 100-41-4     | 3         |
| 2      | m-Xylene                                                 | 108-38-3     | F、M、<br>3 |
| 3      | Isonicotinic acid, 2-phenylethyl ester                   | 1000308-36-3 | F、M、<br>3 |
| 4      | Hexanoic acid                                            | 142-62-1     | 3         |
| 5      | 1,4-cineole                                              | 470-67-7     | 3         |
| 6      | 2-Cyclohexen-1-ol,3-methyl-6-(1-methylethyl)-, 1-acetate | 1204-30-4    | 3         |
| 7      | 2-Isopropyltoluene                                       | 527-84-4     | 3         |
| 8      | (+)-Limonene                                             | 5989-27-5    | 3         |
| 9      | Cineole                                                  | 470-82-6     | 3         |

|    |                                                         |                   |              |
|----|---------------------------------------------------------|-------------------|--------------|
| 10 | 3,5-dichlorotoluene                                     | 25186-47-4        | 3            |
| 11 | 2-Ethylhexyl acrylate                                   | 103-11-7          | M、3          |
| 12 | <b>Precocinelline</b>                                   | <b>38211-56-2</b> | <b>F、M、3</b> |
| 13 | <b>7-Isoquinolinol, 3,4-dihydro-6-methoxy-1-methyl-</b> | <b>4602-71-5</b>  | <b>F、3</b>   |
| 14 | <b>n-Pentacosane</b>                                    | <b>629-99-2</b>   | <b>F、M、3</b> |
| 15 | Ethyl Palmitate                                         | 628-97-7          | 3            |
| 16 | n-Heneicosane                                           | 629-94-7          | F、M          |
| 17 | Oleic acid                                              | 112-80-1          | F、M          |
| 18 | Ethyl linoleate                                         | 544-35-4          | M、3          |
| 19 | Ethyl Oleate                                            | 111-62-6          | M、3          |
| 20 | n-Docosane                                              | 629-97-0          | F、M          |
| 21 | <b>n-Tricosane</b>                                      | <b>638-67-5</b>   | <b>F、M</b>   |
| 22 | Z-12-Pentacosene                                        | 1000131-09-4      | M            |
| 23 | Glycidyl oleate                                         | 1000383-37-7      | F、M          |
| 24 | 2-Methylpentacosane                                     | 629-87-8          | 3            |
| 25 | Pentacosane, 3-methyl-                                  | 6902-54-1         | F、M          |
| 26 | <b>1-Heptacosanol</b>                                   | <b>2004-39-9</b>  | <b>F、M</b>   |
| 27 | n-Hentriacontane                                        | 630-04-6          | F、M          |
| 28 | 1-Hexacosanol                                           | 506-52-5          | F、M          |
| 29 | cis-13-Docosanol                                        | 629-98-1          | F、M          |

Note: In the exist column, "M" indicates the males, "F" indicates the females, and "3" indicates the third-instar larvae. The bold components are also separated by solid phase microextraction.

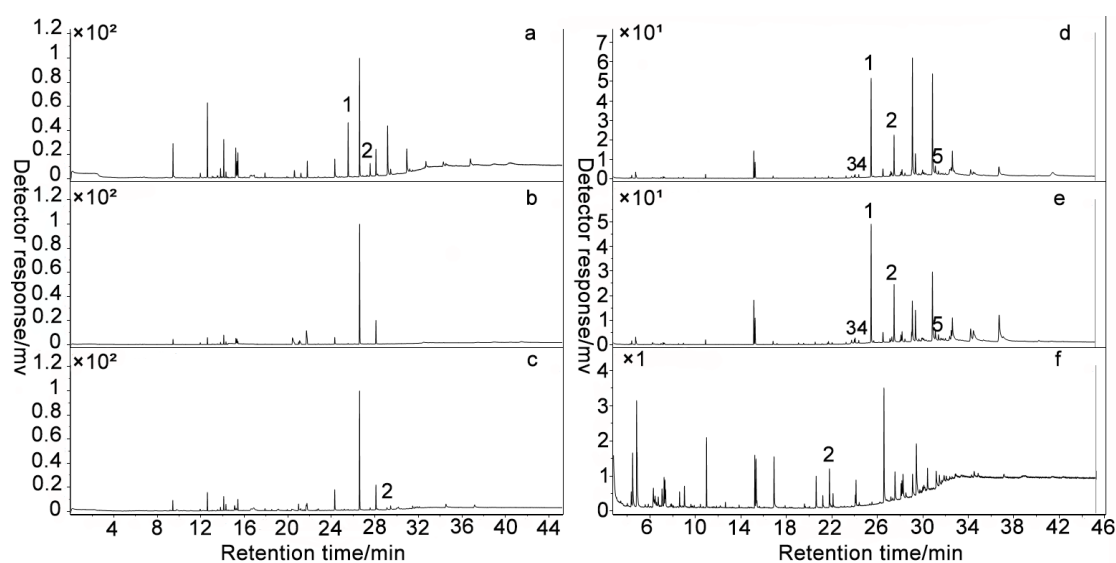

**Supplementary Figure S1.** Chromatogram of volatiles (collected with HS-SPME) and extracts with n-hexane of *Menochilus sexmaculatus*. Note: A, B and C are volatiles of male, female and third-instar larvae extracted by solid phase microextraction; D, E and F are male, female and

third-instar larvae extracted by n-hexane.

**Supplementary Table S3.** Alkane compounds that made up 1 % or more of the extracts with n-hexane and volatiles with HS-SPME of *Menochilus sexmaculatus*

| Peak<br>number <sup>a</sup> | Compound         | Carbon<br>number |
|-----------------------------|------------------|------------------|
| 1                           | n-Tricosane      | 23               |
| 2                           | n-Pentacosane    | 25               |
| 3                           | n-Henicosane     | 21               |
| 4                           | n-Docosane       | 22               |
| 5                           | n-Hentriacontane | 31               |

Note: aPeak numbers correspond to labeled peaks in chromatogram of in Supplementary Figure S1.
